# Supplementary material for: Effect of roasting temperature on lipid and protein oxidation and amino acid residue side chain modification of beef patties
Source: PubMed Central journal article supplement (PMC9034085; doi:10.1039/d1ra03151a), 2021-06-18
Supplement: RA-011-D1RA03151A-s001.pdf [file RA-011-D1RA03151A-s001.pdf]

1 **Supplementary information:**

2 List of modifications caused by heating

|    | Modification type                         | Target residue | Position | Element         | Molecular mass (Da) |
|----|-------------------------------------------|----------------|----------|-----------------|---------------------|
| 1  | Oxidation                                 | CMFHPWY        | Any      | O(1)            | 15.99               |
| 2  | Dioxidation                               | CMFHPWY        | Any      | O(2)            | 31.99               |
| 3  | Trioxidation                              | CFHWY          | Any      | O(3)            | 47.98               |
| 4  | Dehydration                               | S              | Any      | H(-2)O(-1)      | -18.01              |
| 5  | Dehydroalanine                            | Y              | Any      | C(-6)H(-6)O(-1) | -94.04              |
| 6  | Kynurenin                                 | W              | Any      | C(-1)O(1)       | 3.99                |
| 7  | Hydroxykynurenine                         | W              | Any      | C(-1)O(2)       | 19.99               |
| 8  | Acetyl                                    | K              | Any      | C(2)H(2)O       | 42.01               |
| 9  | Carboxymethylation                        | K              | Any      | C(2)H(2)O(2)    | 58.01               |
| 10 | Carboxyethylation                         | K              | Any      | C(3)H(4)O(2)    | 72.02               |
| 11 | $\alpha$ -Amino adipic semialdehyde (AAS) | K              | Any      | H(-3)N(-1)O     | -1.03               |
| 12 | $\alpha$ -Amino adipic acid (AAA)         | K              | Any      | H(-3)N(-1)O(2)  | 14.96               |
| 13 | Malondialdehyde (MDA)                     | KR             | Any      | C(3)H(2)O       | 54.01               |
| 14 | 4-Hydroxy-2-nonenal (HNE)                 | CHKR           | Any      | C(9)H(16)O(2)   | 156.12              |
| 15 | Carbonylation                             | KR             | Any      | H(-2)O(-1)      | 18.01               |

3

4
